# Supplementary material
Source: publisher figshare collection journal article supplement (https://acs.figshare.com/ndownloader/files/4733614)
Supplement: Supplementary file 1 [file 4733614]

**Supporting Information for “Wet chemical needlelike  
assemblies of single-walled carbon  
nanotubes on silicon surface”**

Xing-Jiu Huang, Seong-Wan Ryu, Hyung-Soon Im, and Yang-Kyu Choi\*

*Nano-Bio-Electronic Lab, Department of Electrical Engineering and Computer  
Science, Korea Advanced Institute of Science and Technology, 373-1 Guseong-dong,  
Yuseong-gu, Daejeon, South Korea.*

---

\* To whom correspondence should be addressed. Phone: 82-42-869-3477. Fax:  
82-505-869-3477. E-mail address: ykchoi@ee.kaist.ac.kr.

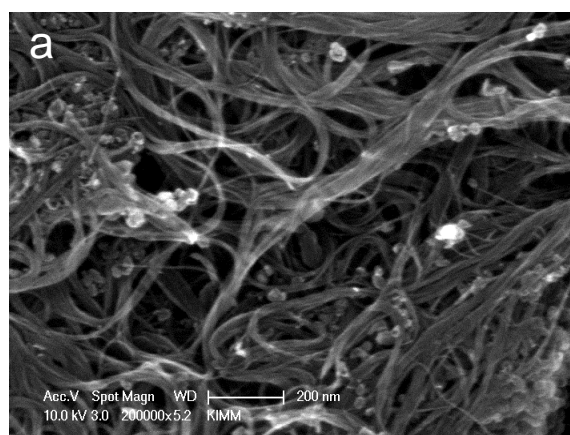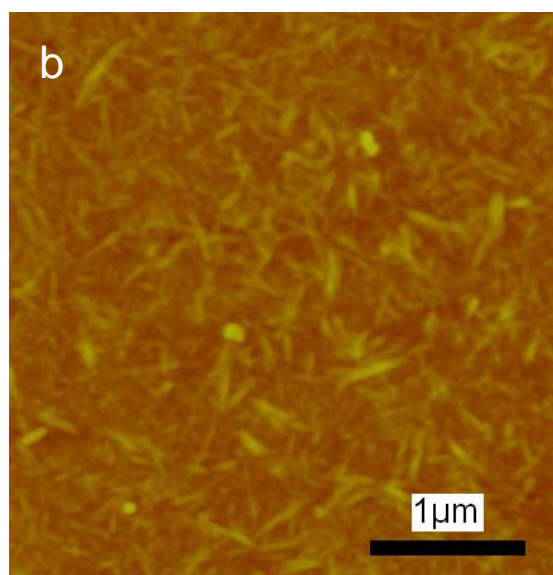

**Figure S1.** The morphology of single-walled carbon nanotubes before (a) and after (b) chemical cutting.

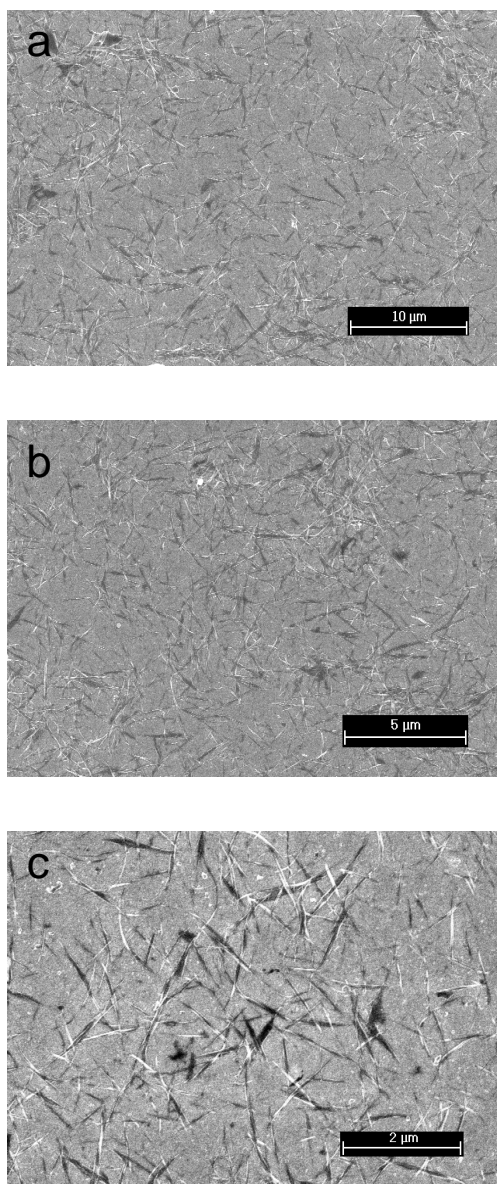

**Figure S2.** The morphology of shortened single-walled carbon nanotubes under different cutting time at about 50 °C. **a)** 3 hrs; **b)** 5 hrs; **c)** 7 hrs.

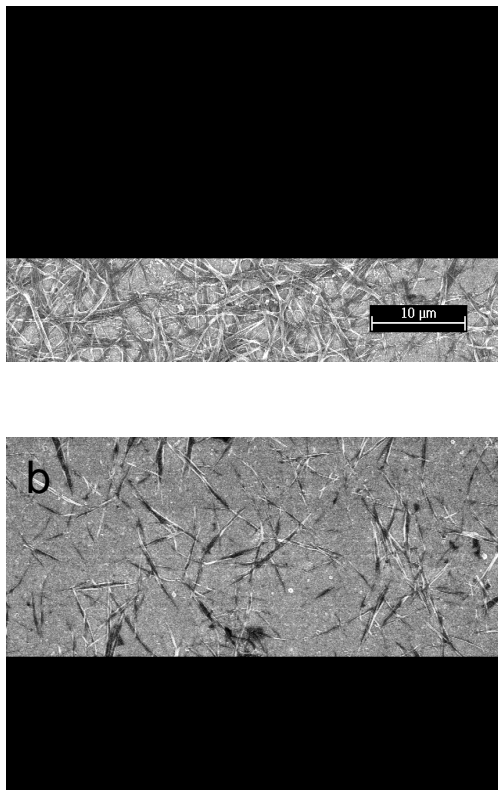

**Figure S3.** The morphology of shortened single-walled carbon nanotubes under different cutting temperature at cutting time of 6 hrs. **a)** 20 °C; **b)** 50 °C.

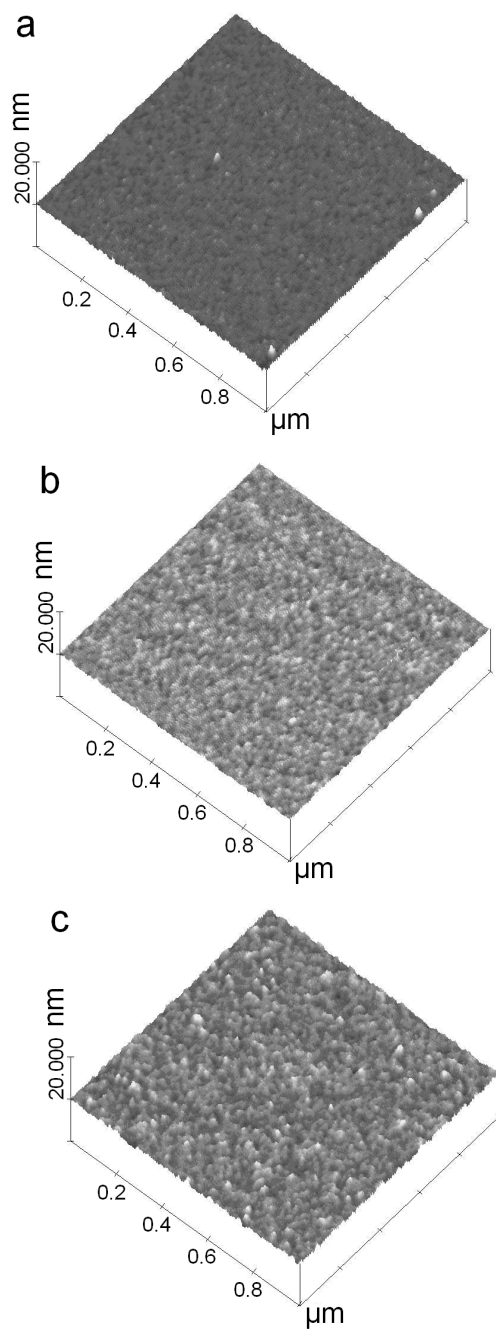

**Figure S4.** Typical tapping mode AFM height images of silicon surface. **a)** bare silicon wafer after washing in detergent solution for 30 min, then rewashing using acetone and DDW. **b)**  $\text{H}_2\text{SO}_4/\text{H}_2\text{O}_2$  pretreated silicon wafer, sonication for 1h at 50  $^\circ\text{C}$ . **c)** after silanization of silicon wafer.

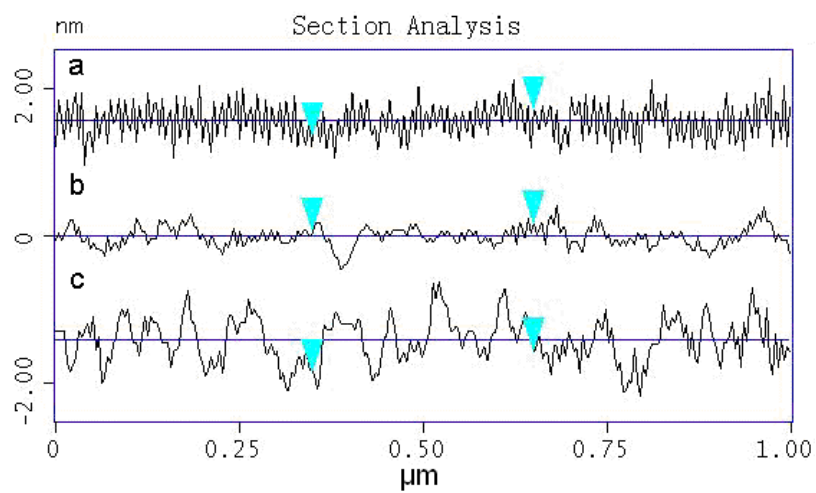

**Figure S5.** Typical cross section of the bare silicon (a),  $\text{H}_2\text{SO}_4/\text{H}_2\text{O}_2$  mixture pretreated silicon (b), and silanization silicon (c) in AFM images

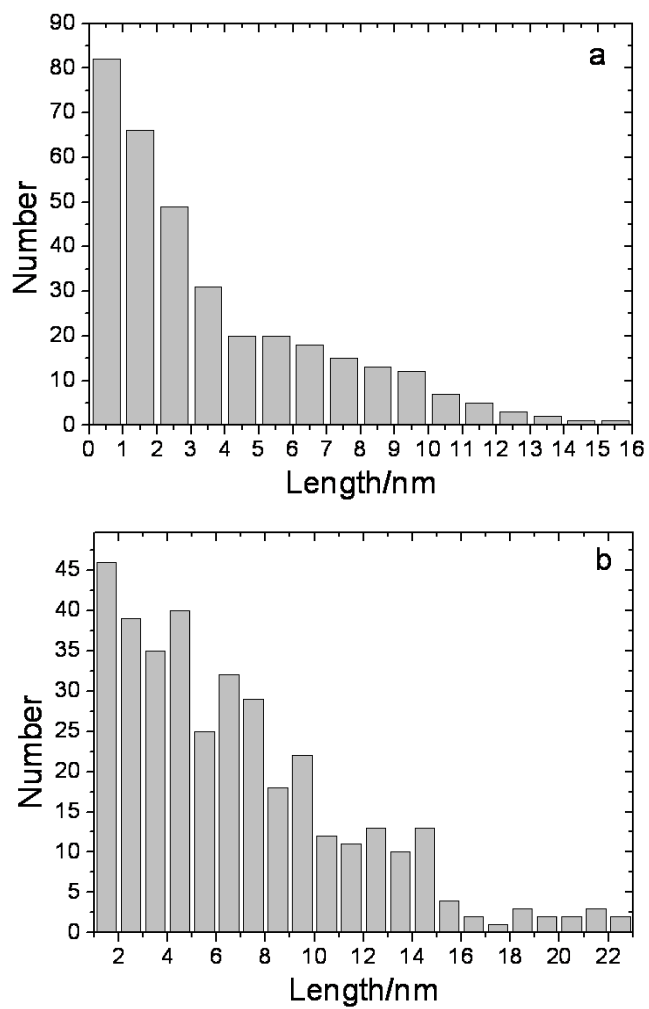

**Figure S6.** Histograms of the length (a, 1h; b, 6h) distributions of single-walled carbon nanotubes assembled on silicon obtained from AFM images at different assembling times.

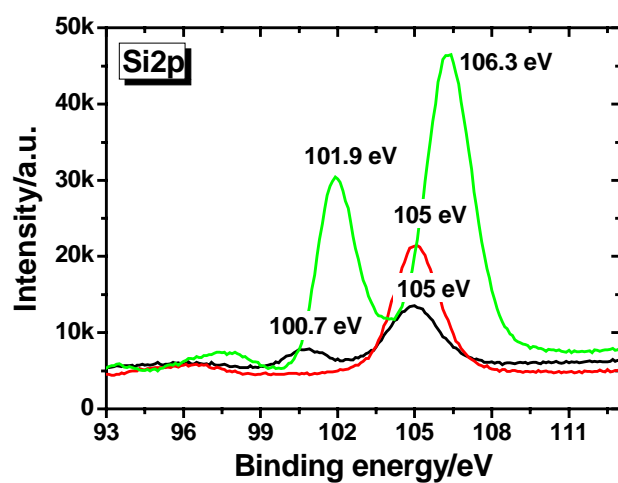

**Figure S7.** High-resolution Si2p spectra at each stage of the assembly.  $\text{H}_2\text{SO}_4/\text{H}_2\text{O}_2$  pretreated silicon (bright green), silanization silicon (red), and single-walled carbon nanotube assembled silicon (black).
